# Supplementary material
Source: publisher figshare collection journal article supplement (https://acs.figshare.com/ndownloader/files/5699829)
Supplement: Supplementary file 1 [file 5699829]

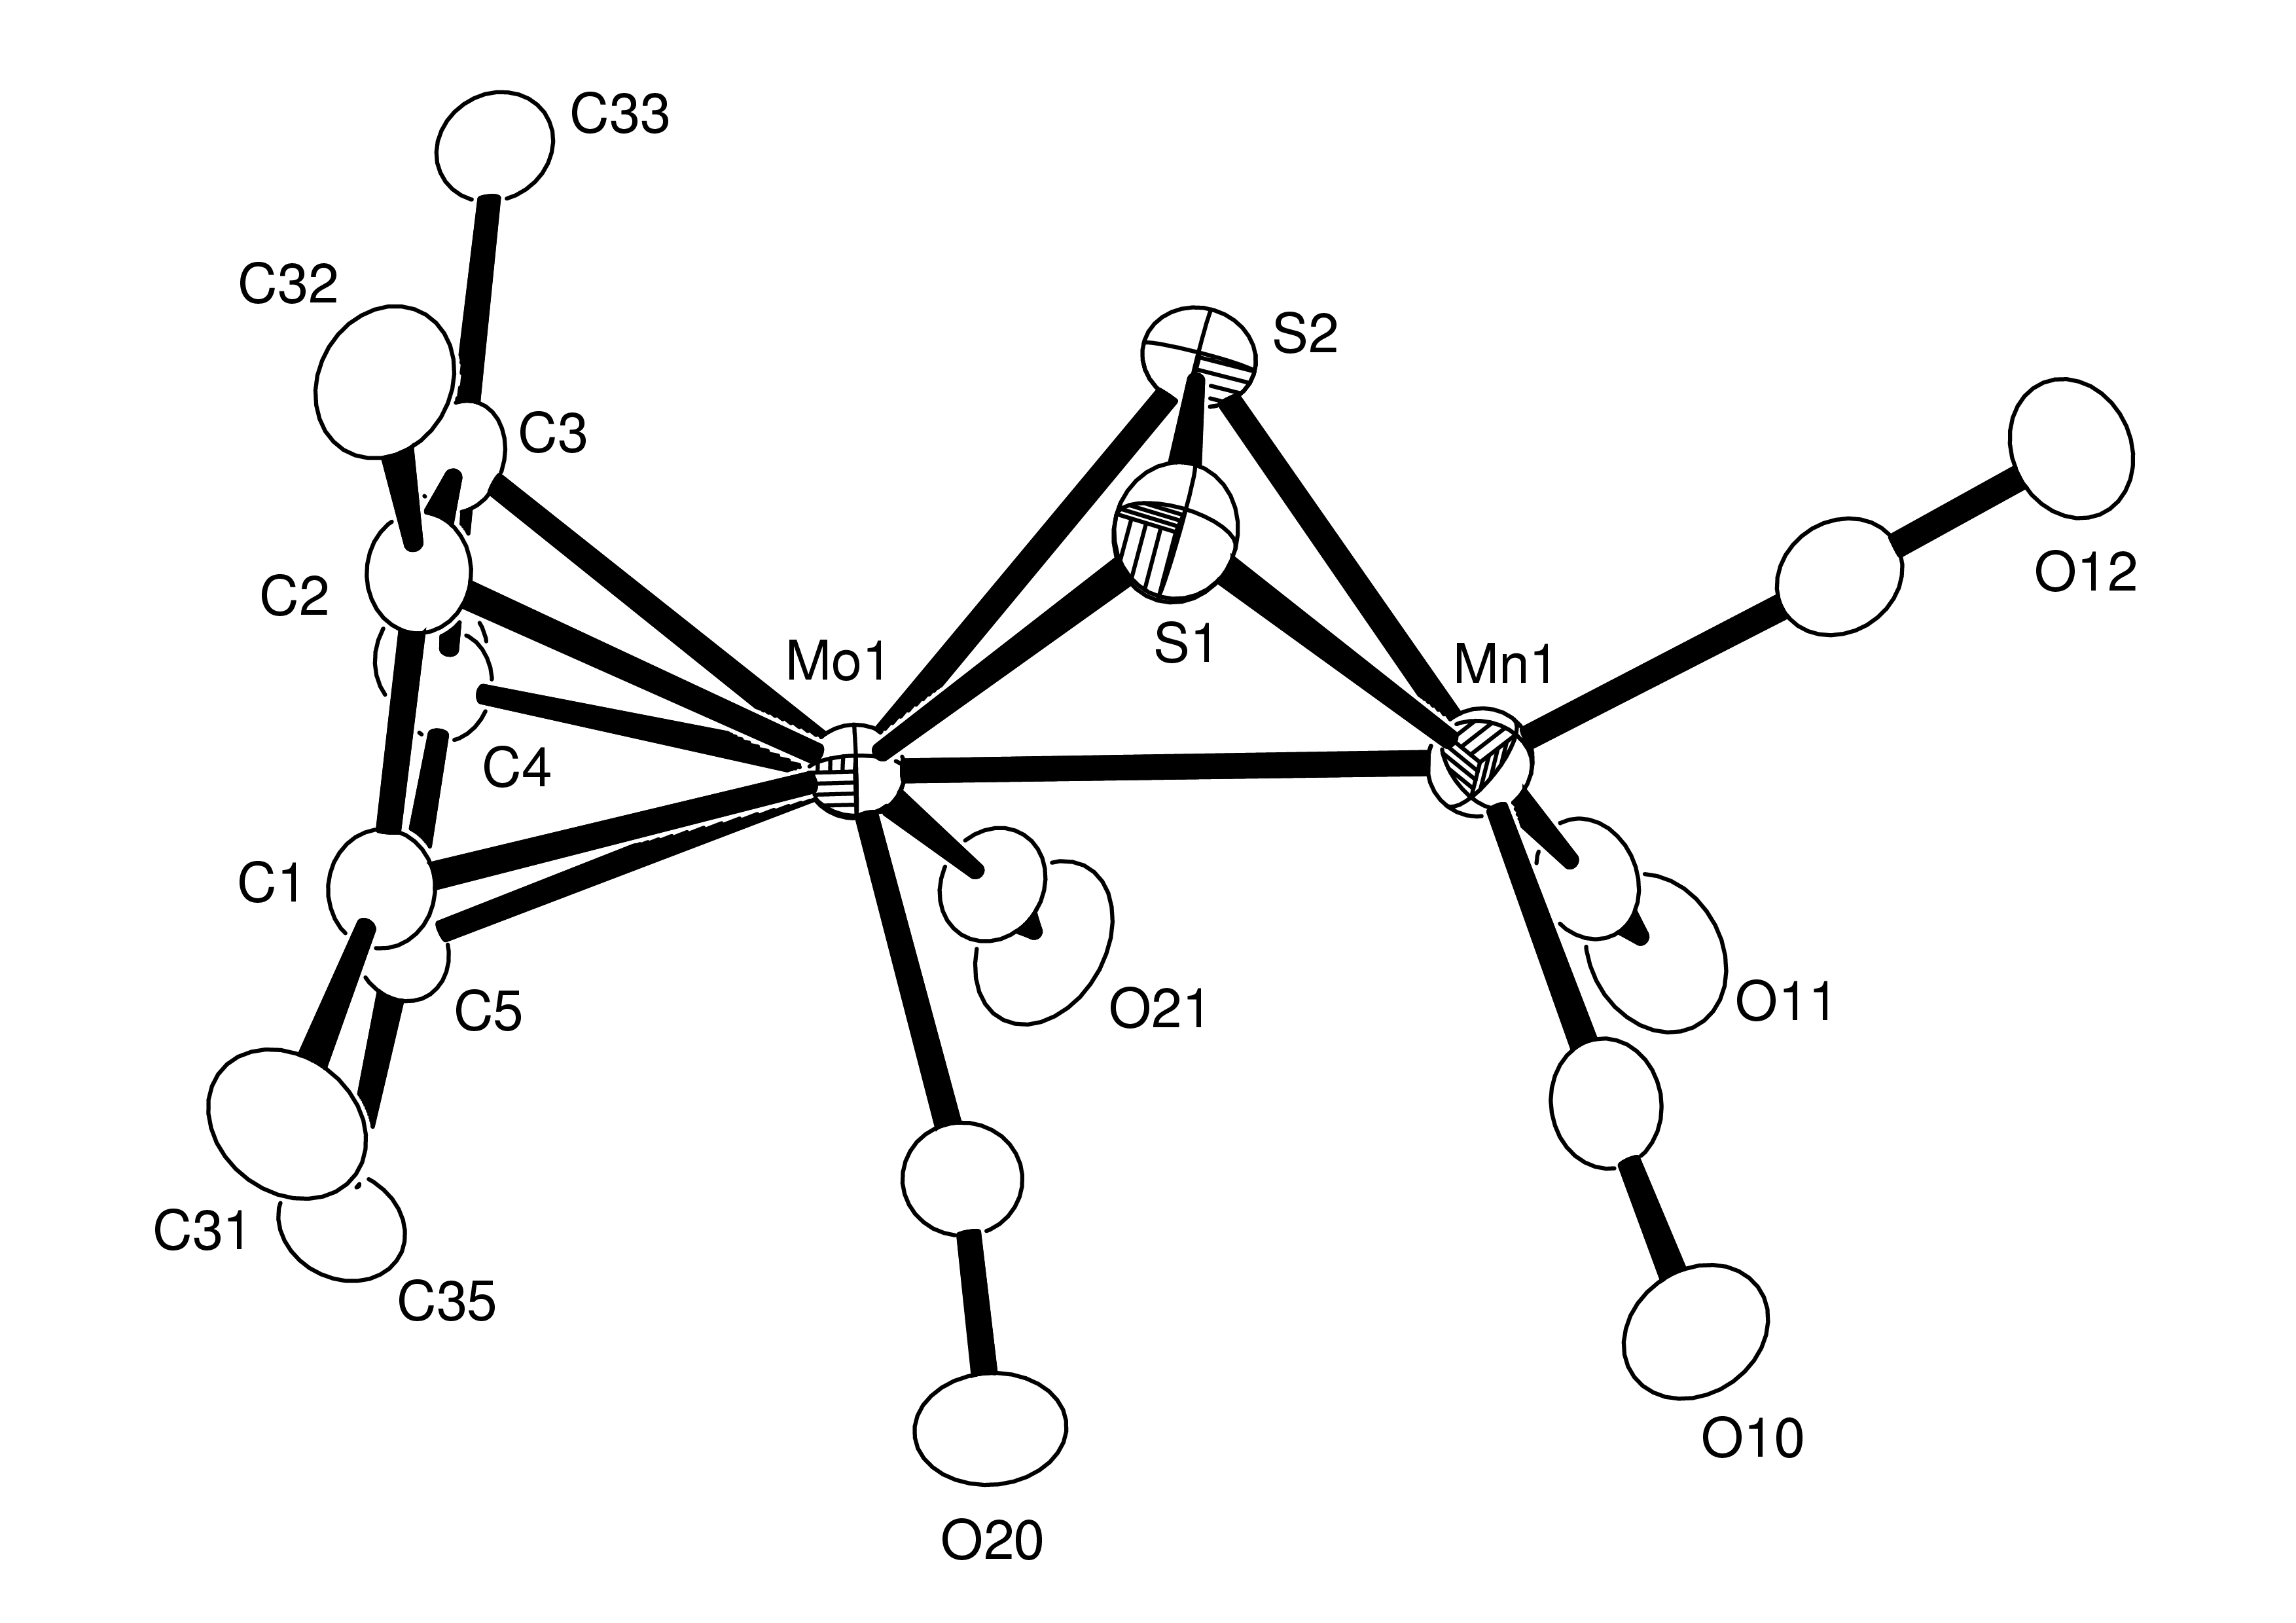


**Figure S1.** An ORTEP diagram of the molecular structure of Cp*MoMn(CO)5(-S2), **3**,showing 40 % thermal ellipsoid probability.


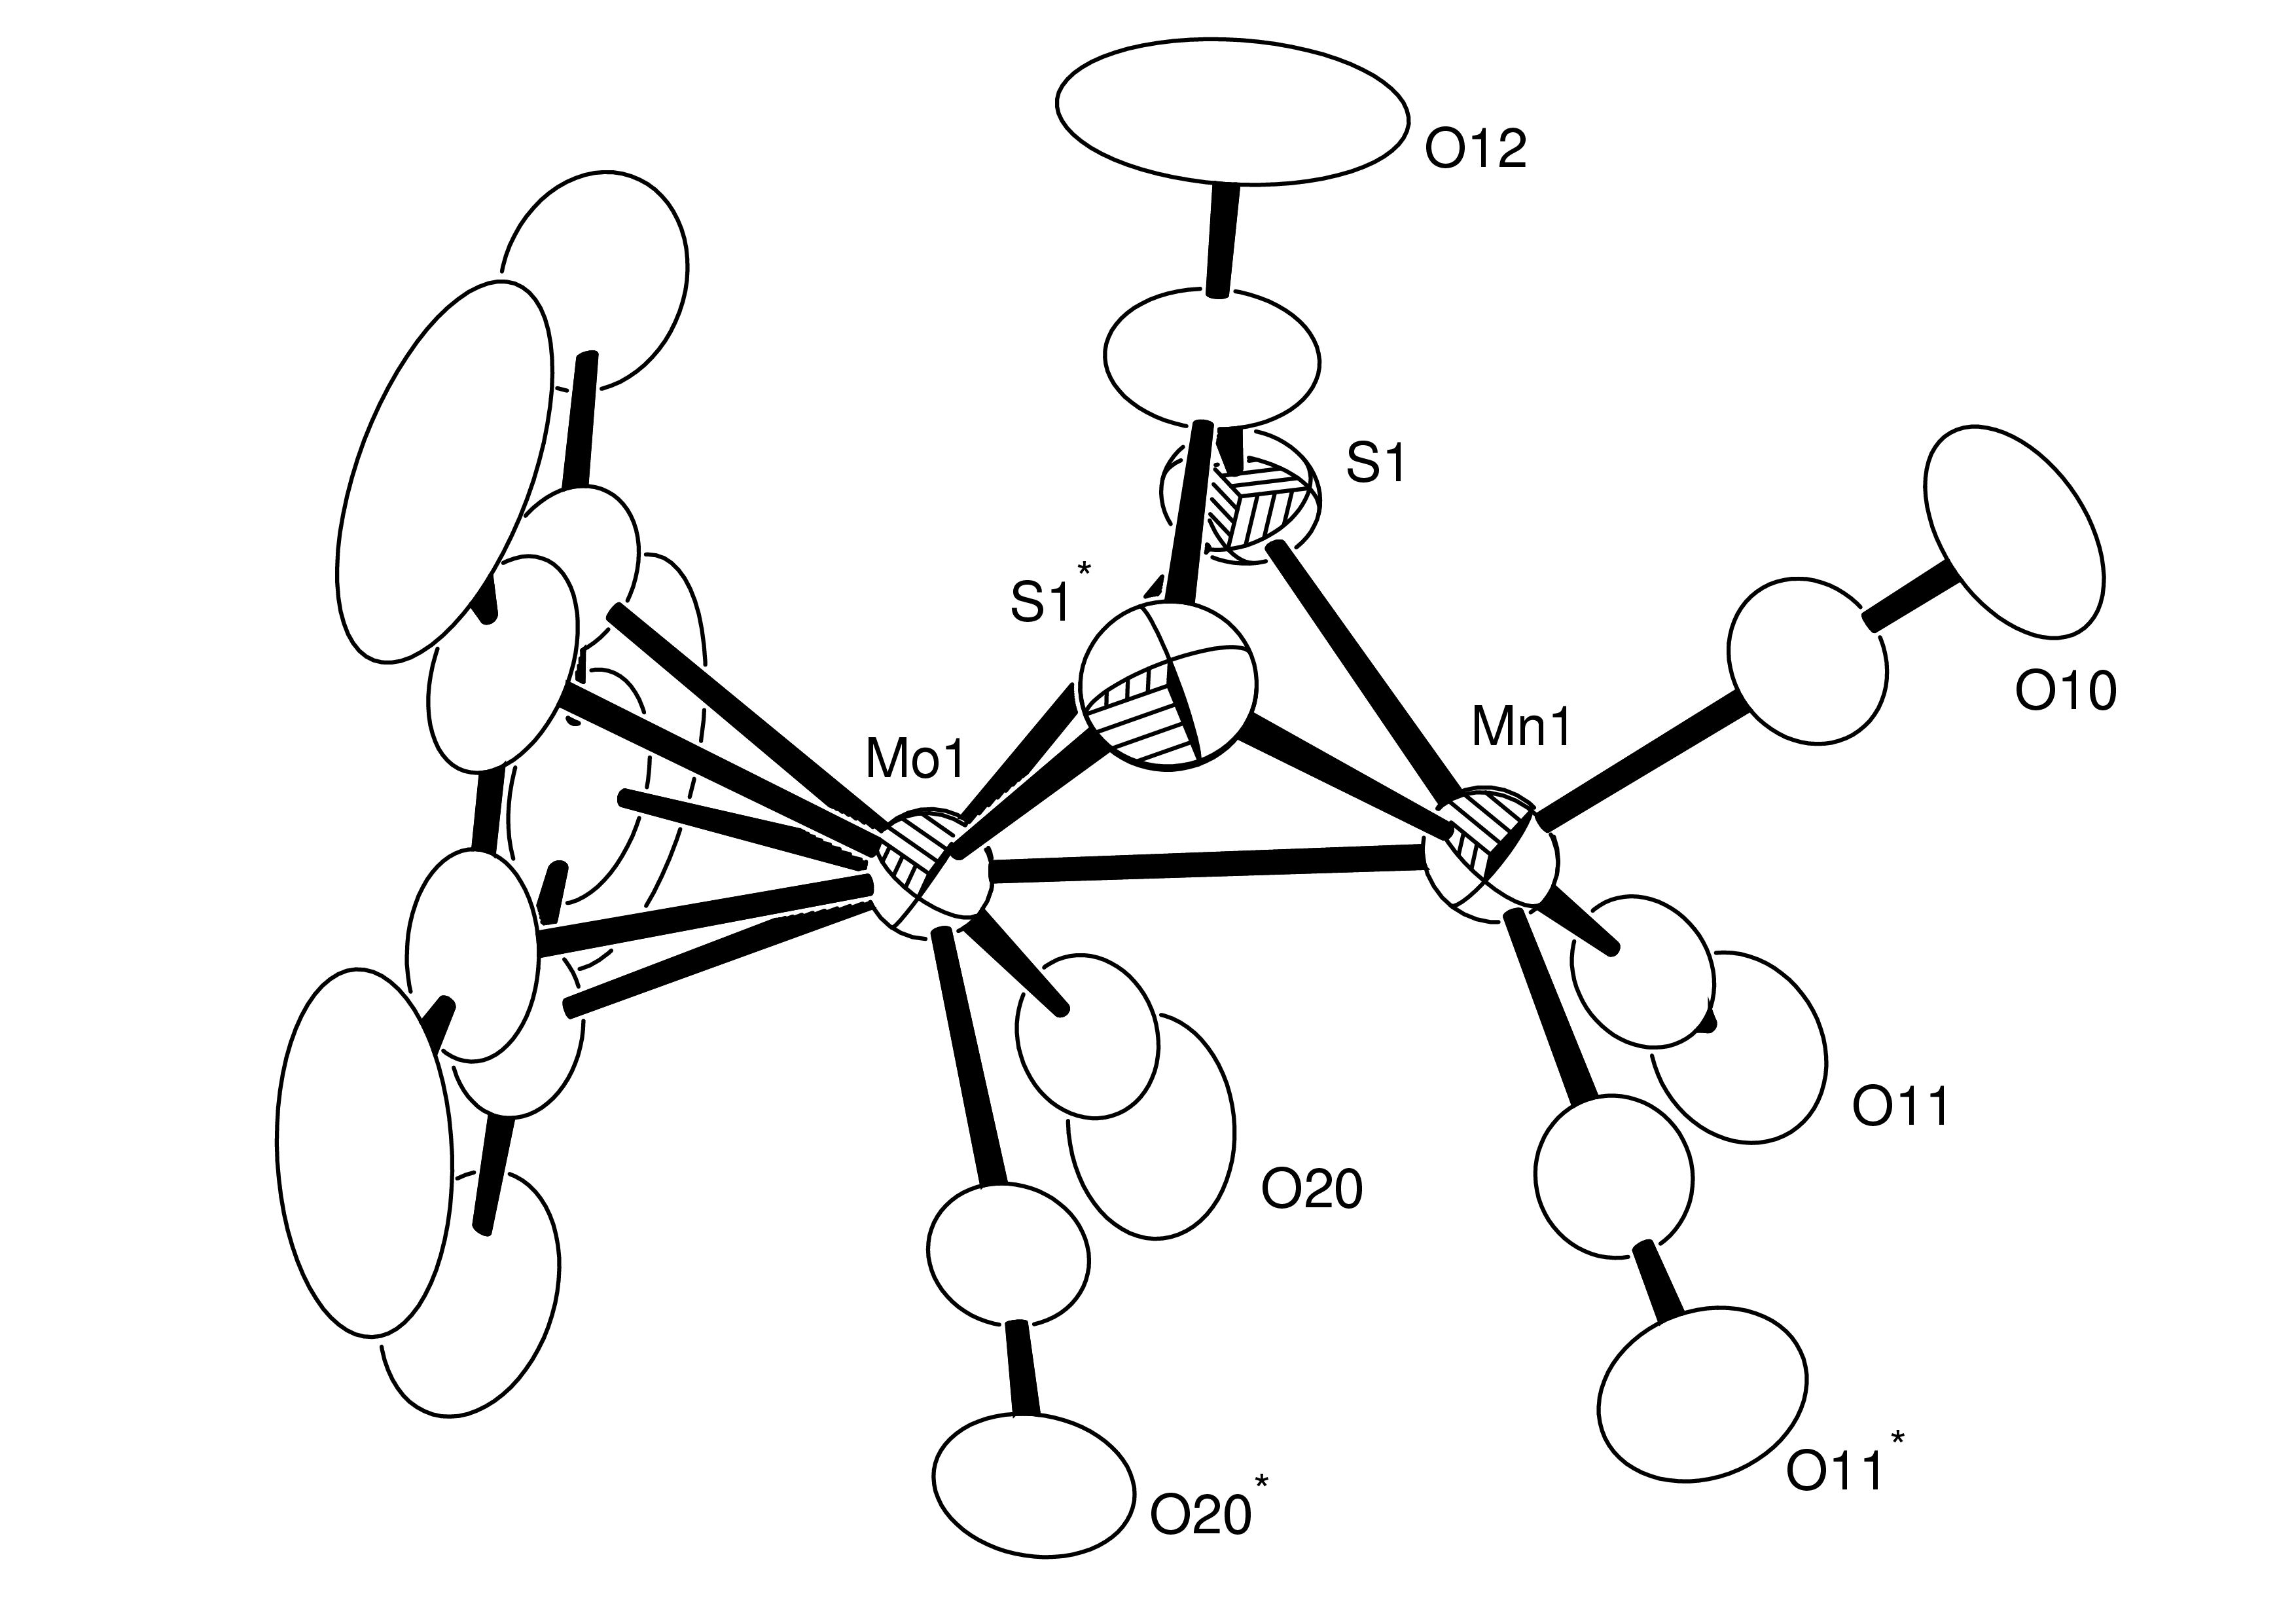


**Figure S2.** An ORTEP diagram of the molecular structure of Cp*MoMn(CO)5[-SC(=O)S], **6** showing 50 % thermal ellipsoid probability.


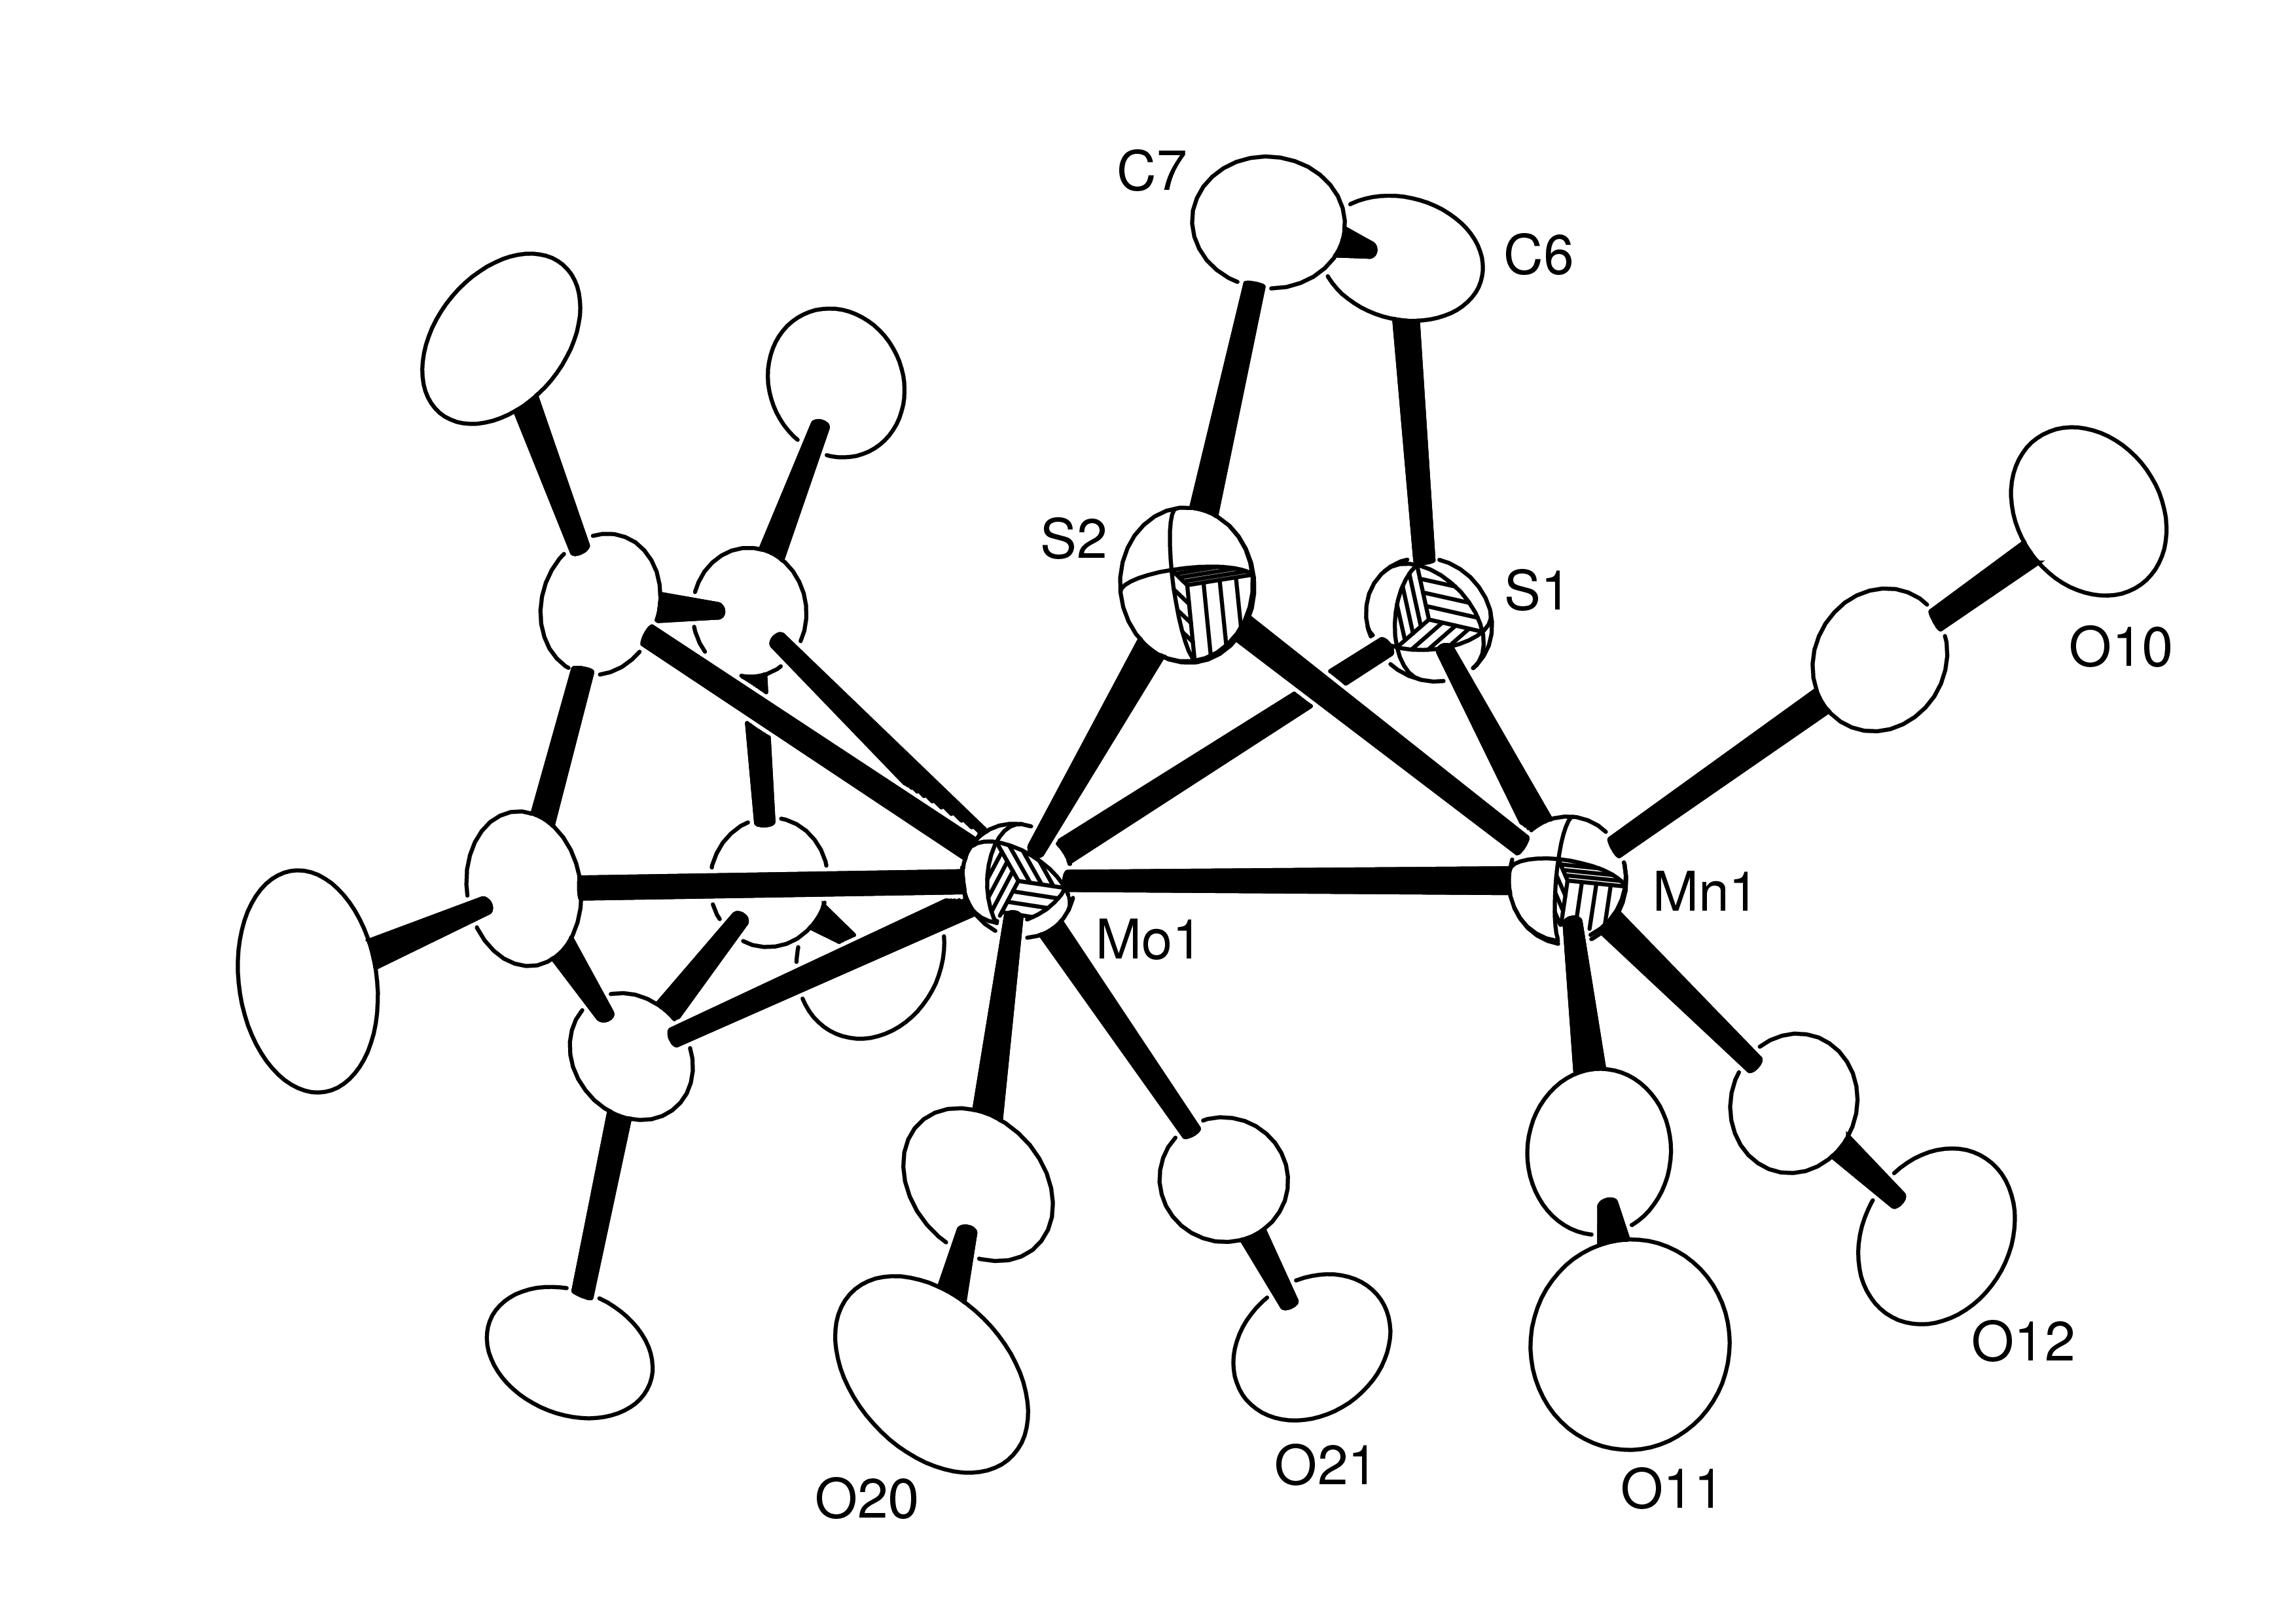


**Figure S3.** An ORTEP diagram of the molecular structure of Cp*MoMn(CO)5(-SCH2CH2S), **10** showing 50 % thermal ellipsoid probability.


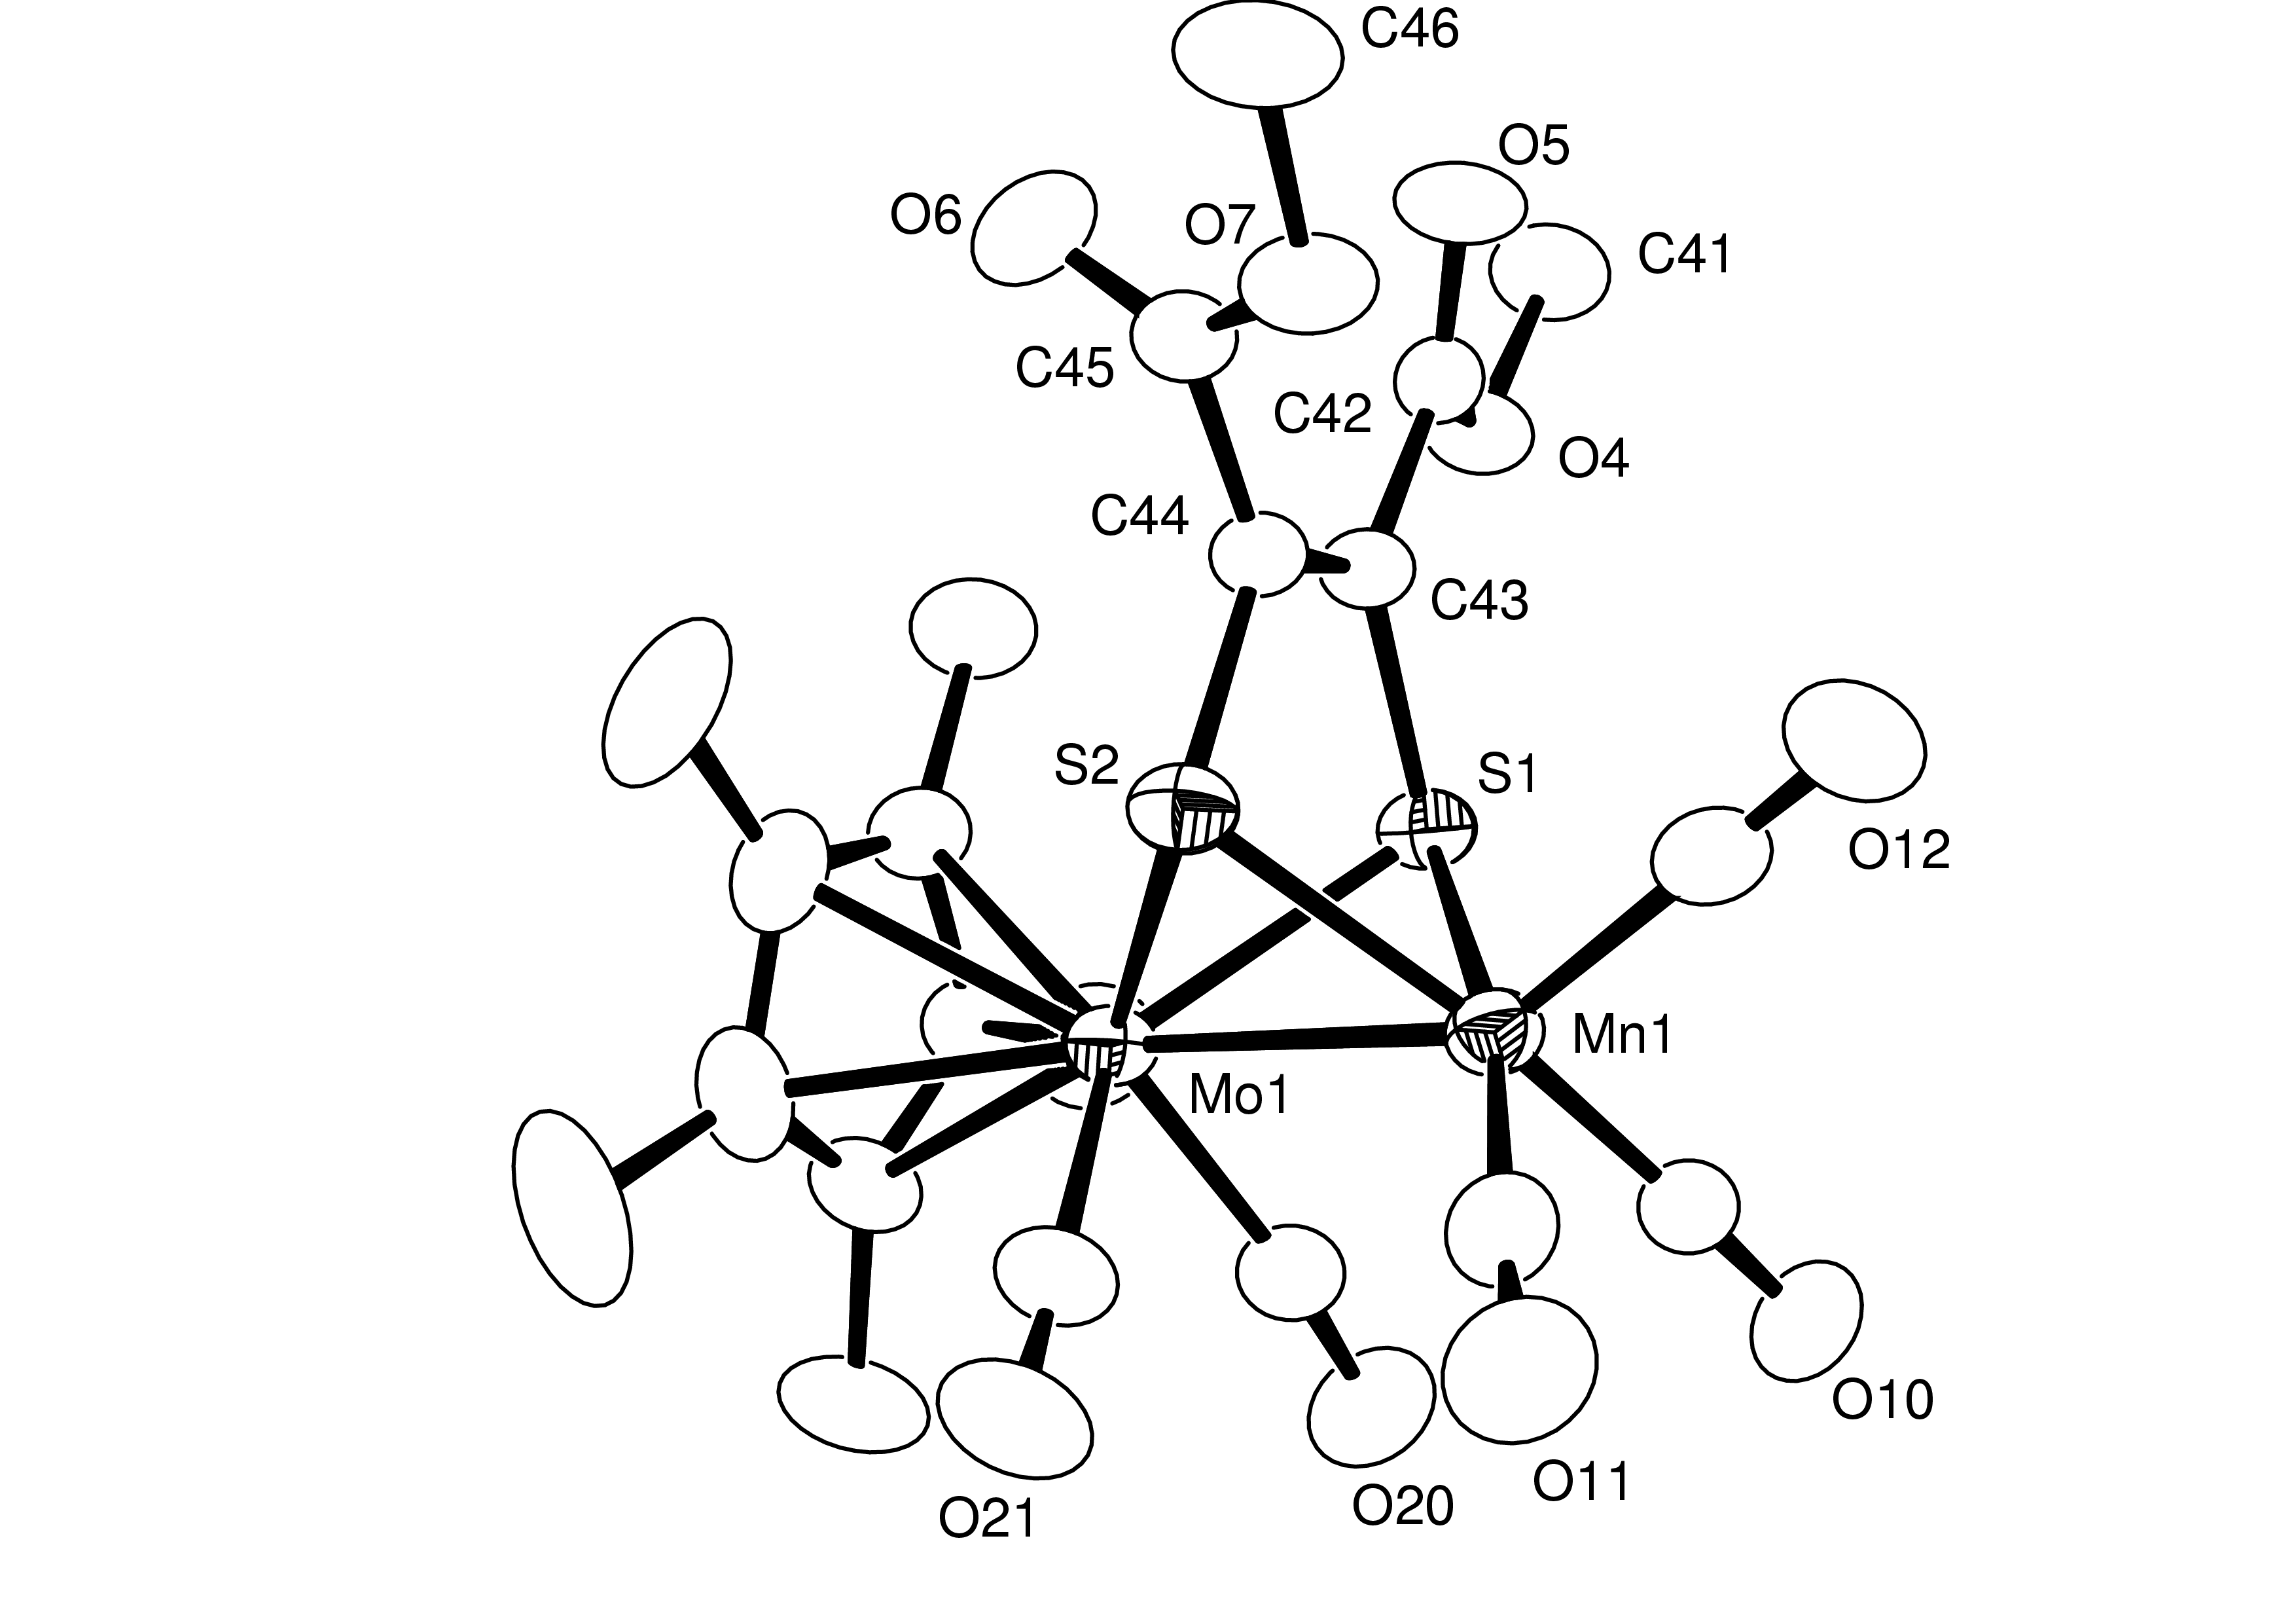


**Figure S4.** An ORTEP diagram of the molecular structure of Cp*MoMn(CO)5[-S(MeO2)CC(O2Me)S]2, **12** showing 50% thermal ellipsoid probability.
